# Supplementary material for: Metabolic and fitness determinants for in vitro growth and intestinal colonization of the bacterial pathogen Campylobacter jejuni
Source: PLoS Biol. 2017 May 19;15(5):e2001390. doi: 10.1371/journal.pbio.2001390 (PMC5438104; doi:10.1371/journal.pbio.2001390)
Supplement: S2 Table — (XLSX) [file pbio.2001390.s019.xlsx]

## Sheet: Sheet1
Table S2: List of genes that show similar mutant phenotype according to the Venn diagram depicted in Figure 1B and C.
A: List of genes whose insertion mutants show decreased growth in all 4 in vitro conditions tested
Gene ID	Symbol	log2(fc)1				Annotation
		Rich Medium	DMEM +Asn	DMEM +Gln	DMEM +Ser
Transporters:
CJJ81176_0052	-	-4.04442	-4.27456	-5.023	-5.0666	sodium/dicarboxylate symporter
CJJ81176_0177	znuB	-4.7734	-3.18295	-4.7734	-4.7734	zinc ABC transport permease
CJJ81176_0179	znuA	-4.9728	-4.9728	-4.9728	-4.9728	periplasmic zinc binding protein
CJJ81176_0795	metN	-6.78999	-3.17935	-4.60842	-5.11568	ABC transporter, ATP-binding protein
CJJ81176_1616	sdaC	-6.87265	-4.37595	-5.53376	-8.38797	serine transporter
Energy production and coenzyme metabolism:
CJJ81176_0134	birA	-3.01683	-3.01683	-3.01683	-3.01683	biotin--protein ligase
CJJ81176_0162	accD	-3.60259	-3.60259	-3.60259	-3.60259	acetyl-CoA carboxylase subunit beta
CJJ81176_0327	bioG	-3.72396	-3.84986	-6.13158	-6.27938	biotin synthesis protein bioG
CJJ81176_0336	lysA	-4.01802	-3.14798	-4.01802	-4.01802	diaminopimelate decarboxylase
CJJ81176_0434	frdB	-3.42322	-4.52811	-6.49403	-8.55055	fumarate reductase iron-sulfur subunit
CJJ81176_1067	thiF	-3.15816	-3.71819	-3.71819	-3.71819	thiamine biosynthesis protein ThiF
CJJ81176_1511	moeA2	-3.71145	-3.28686	-3.9075	-4.3812	molybdopterin biosynthesis MoeA protein, putative
Nucleotide metabolism:
CJJ81176_0258	pyrE	-5.66269	-5.66269	-5.66269	-5.66269	orotate phosphoribosyltransferase
CJJ81176_0540	purC	-4.43716	-5.06303	-5.06303	-5.06303	phosphoribosylaminoimidazole-succinocarboxamide synthase
CJJ81176_0825	pyrD	-6.28412	-6.76051	-6.76051	-6.76051	dihydroorotate dehydrogenase 2
CJJ81176_1486	carA	-6.71947	-6.71947	-6.71947	-6.71947	carbamoyl phosphate synthase small subunit
CJJ81176_1490	purA	-7.47032	-5.3627	-6.71435	-7.47032	adenylosuccinate synthetase
Respiration and response to oxidative stress:
CJJ81176_0182	trxB	-3.47691	-3.47691	-3.47691	-3.47691	thioredoxin-disulfide reductase
CJJ81176_0392	ccoG_rdxA_fixG	-3.31243	-3.00954	-3.84814	-4.92547	cytochrome c oxidase accessory protein CcoG
CJJ81176_0800	tpx	-5.93255	-4.1401	-5.21017	-6.47843	thiol peroxidase
CJJ81176_0919	-	-3.18702	-3.18702	-3.18702	-3.18702	SCO1/SenC family protein
CJJ81176_1124	-	-4.41063	-4.41063	-4.41063	-4.41063	thioredoxin domain-containing protein
CJJ81176_1222	-	-4.12263	-4.71892	-3.83056	-4.71892	thioredoxin
CJJ81176_1382	-	-3.01683	-3.01683	-3.01683	-3.01683	oxidoreductase that catalyzes disulfide bond formation in the periplasm
CJJ81176_1553	nuoL	-5.01862	-5.01862	-4.34563	-5.01862	NADH dehydrogenase subunit L
Cell envelop biogenesis:
CJJ81176_0164	bamA	-4.71892	-4.71892	-4.04593	-4.71892	Outer membrane protein assembly factor
CJJ81176_0260	secG	-3.92484	-3.92484	-3.92484	-3.92484	preprotein translocase subunit SecG
CJJ81176_1430	-	-7.52691	-6.45308	-6.06638	-6.47573	putative nucleotide-sugar epimerase-dehydratase
CJJ81176_1431	-	-3.03897	-3.24939	-4.35633	-3.33653	putative sugar transferase
CJJ81176_1436	-	-3.10632	-3.38781	-4.5704	-3.58244	putative glycosyl transferase
CJJ81176_1440	kpsT	-5.9277	-4.18402	-5.40844	-6.55817	capsular polysaccharide ABC transporter, ATP-binding protein
CJJ81176_1441	kpsM	-3.82521	-3.82521	-3.06924	-3.82521	capsular polysaccharide ABC transporter, permease protein
DNA replication and repair
CJJ81176_0026	ruvC	-4.66231	-4.66231	-4.66231	-4.66231	Holliday junction resolvase
CJJ81176_0609	nidH	-5.75397	-5.99692	-5.07867	-6.96158	dinucleoside polyphosphate hydrolase
CJJ81176_0672	-	-4.65455	-3.17825	-5.30413	-5.30413	TatD family hydrolase
CJJ81176_0969	-	-3.54471	-4.51439	-5.26401	-6.64838	helicase
CJJ81176_1474	-	-4.7252	-3.10911	-3.97047	-3.41012	ATP-dependent helicase
CJJ81176_1475	-	-4.66813	-3.54894	-5.22816	-5.22816	ATP-dependent helicase, DNA repair
Translation and protein turnover
CJJ81176_0189	-	-4.60339	-4.60339	-4.60339	-4.60339	RNA methyltransferase
CJJ81176_0259	frr	-4.01802	-3.31313	-4.01802	-4.01802	ribosome recycling factor
CJJ81176_0131	obgE	-4.18808	-4.18808	-4.18808	-4.18808	GTPase ObgE
CJJ81176_1125	clpS	-4.92547	-4.12449	-4.92547	-4.92547	ATP-dependent Clp protease adaptor protein
CJJ81176_1126	clpA	-5.63438	-4.57391	-4.95918	-5.74548	ATP-dependent Clp protease, ATP-binding subunit ClpA
CJJ81176_1243	dnaJ-1	-5.14796	-4.35849	-4.39199	-5.14796	co-chaperone protein DnaJ
Flagellar Motility
CJJ81176_1093	fliW	-5.30413	-5.30413	-5.30413	-5.30413	flagellar assembly protein FliW
Hypothetical proteins
CJJ81176_0149	-	-4.12514	-3.09742	-3.70155	-5.10612	hypothetical protein
CJJ81176_0193	-	-3.92484	-3.92484	-3.92484	-3.92484	hypothetical protein
CJJ81176_0367	-	-6.3971	-6.37102	-6.81835	-9.33434	hypothetical protein
CJJ81176_0447	-	-4.71892	-4.71892	-4.71892	-4.71892	hypothetical protein
CJJ81176_0518	-	-4.9728	-4.9728	-4.9728	-4.9728	putative lipoprotein
CJJ81176_0547	-	-3.71819	-3.71819	-3.71819	-3.71819	hypothetical protein
CJJ81176_0638	-	-7.22854	-6.52365	-7.22854	-7.22854	hypothetical protein
CJJ81176_0747	-	-4.09028	-5.26664	-4.02539	-4.42733	hypothetical protein
CJJ81176_0797	-	-3.18702	-3.18702	-3.18702	-3.18702	hypothetical protein
CJJ81176_0886	-	-4.66231	-3.87284	-3.90634	-3.50795	hypothetical protein
CJJ81176_0982	-	-3.18702	-3.18702	-3.18702	-3.18702	hypothetical protein
CJJ81176_1055	-	-3.51259	-4.33943	-3.80299	-3.07045	hypothetical protein
CJJ81176_1631	-	-4.78064	-4.5512	-4.4523	-5.34067	hypothetical protein
B: List of genes whose insertion mutants show decreased growth in DMEM but not in rich media.
Gene ID	Symbol	log2(fc)2				Annotation
		Rich Mediuam	DMEM +Asn	DMEM +Gln	DMEM +Ser
CJJ81176_0055	recJ	-2.76395	-4.09308	-4.42237	-4.68651	single-stranded-DNA-specific exonuclease RecJ
CJJ81176_0132	proB	-0.418284	-4.69403	-7.9363	-5.63958	gamma-glutamyl kinase
CJJ81176_0218	purN	-0.666219	-3.62192	-4.13318	-3.99651	phosphoribosylglycinamide formyltransferase
CJJ81176_0220	-	-2.17622	-3.98913	-4.63761	-4.48109	hypothetical protein
CJJ81176_0227	purF	0.102194	-3.98646	-4.68217	-4.59438	amidophosphoribosyltransferase
CJJ81176_0305	carB	-1.84157	-5.63485	-7.36911	-6.92619	carbamoyl phosphate synthase large subunit
CJJ81176_0318	-	-1.88229	-3.08579	-3.46421	-3.34469	thiF family protein
CJJ81176_0328	bioF	-2.02075	-3.25682	-3.32746	-4.2025	8-amino-7-oxononanoate synthase
CJJ81176_0329	bioA	-2.58958	-4.97495	-5.59922	-4.92995	adenosylmethionine--8-amino-7-oxononanoate transaminase
CJJ81176_0330	bioD	-2.45759	-4.04628	-5.21119	-6.24778	dethiobiotin synthetase
CJJ81176_0338	pheA	-1.08599	-3.47517	-4.18808	-4.18808	chorismate mutase/prephenate dehydratase
CJJ81176_0404	pyrF	-1.938	-6.21199	-7.79834	-8.32441	orotidine 5'-phosphate decarboxylase
CJJ81176_0415	pyk	-2.46403	-4.07958	-3.97288	-3.80732	pyruvate kinase
CJJ81176_0432	frdC	-2.83497	-4.19955	-5.62983	-8.3942	fumarate reductase cytochrome b-556 subunit
CJJ81176_0433	frdA	-2.70695	-4.71344	-6.52903	-7.98945	fumarate reductase flavoprotein subunit
CJJ81176_0477	dnaQ	-2.71088	-3.24318	-3.64388	-4.27358	DNA polymerase III subunit epsilon
CJJ81176_0541	purS	-0.757431	-3.62719	-4.0709	-4.16559	phosphoribosylformylglycinamidine synthase, purS protein
CJJ81176_0542	purQ	-0.505125	-3.71527	-4.27088	-3.95142	phosphoribosylformylglycinamidine synthase I
CJJ81176_0546	htpG	-2.66429	-3.43128	-3.49105	-4.13614	heat shock protein 90
CJJ81176_0558	sucC	-0.430588	-4.70042	-5.86673	-5.36968	succinyl-CoA synthetase subunit beta
CJJ81176_0583	proA	-0.220886	-4.69494	-6.86852	-5.13288	gamma-glutamyl phosphate reductase
CJJ81176_0584	-	-2.50136	-3.9498	-4.6356	-5.27838	pyridine nucleotide-disulphide oxidoreductase family protein
CJJ81176_0621	-	-0.402382	-3.09434	-4.36998	-3.7256	integral membrane protein
CJJ81176_0622	-	-0.51359	-3.05208	-3.85196	-4.13821	DNA/RNA non-specific endonuclease
CJJ81176_0671	cbrR	-1.78888	-4.52011	-5.96319	-7.08935	diguanylate cyclase.
CJJ81176_0673	-	-2.07036	-3.48467	-4.69253	-4.57822	membrane-bound lytic murein transglycosylase D, putative
CJJ81176_0725	purE	-2.20864	-4.63434	-4.9985	-6.14823	phosphoribosylaminoimidazole carboxylase catalytic subunit
CJJ81176_0859	-	-2.19125	-6.17532	-8.01544	-7.49827	soluble lytic murein transglycosylase, putative
CJJ81176_0860	-	-1.28151	-5.20324	-6.64264	-8.1689	YGGT family protein,integral membrane proteins
CJJ81176_0940	pycB	-2.32614	-3.52516	-4.59223	-8.33216	pyruvate carboxylase subunit B
CJJ81176_0976	purH	0.320783	-3.21237	-3.89118	-3.73207	bifunctional phosphoribosylaminoimidazolecarboxamide formyltransferase/IMP cyclohydrolase
CJJ81176_0978	purL	-1.02404	-3.90565	-4.56016	-4.45855	phosphoribosylformylglycinamidine synthase II
CJJ81176_1091	lon	-2.45183	-3.82521	-3.82521	-3.82521	ATP-dependent protease La
CJJ81176_1094	proC	-0.671389	-4.89025	-5.60596	-4.82339	pyrroline-5-carboxylate reductase
CJJ81176_1115	sstT	-1.08828	-3.3638	-3.94999	-3.96154	serine/threonine transporter SstT
CJJ81176_1116	pyrB	-0.846453	-5.44616	-7.96326	-7.24106	aspartate carbamoyltransferase catalytic subunit
CJJ81176_1146	pglH	-2.28037	-3.03607	-3.42706	-4.54195	general glycosylation pathway protein
CJJ81176_1213	luxS	-2.97577	-3.26772	-3.59737	-4.23549	S-ribosylhomocysteinase
CJJ81176_1232	asmA	-1.49228	-3.197	-5.16357	-3.88721	predicted assembly protein
CJJ81176_1389	-	-2.90701	-4.44045	-5.18504	-5.45253	DNA-binding protein
CJJ81176_1412	kpsS	-2.37057	-3.06645	-4.52892	-3.10139	capsule polysaccharide export protein KpsS
CJJ81176_1415	-	-0.623056	-3.60459	-4.75862	-3.46863	putative sugar-1-phosphate nucleotidyltransferase
CJJ81176_1424	hddA	-2.76239	-3.03803	-4.15372	-3.27813	capsular biosynthesis sugar kinase, putative
CJJ81176_1514	purM	-0.503765	-3.88515	-4.53205	-4.46436	phosphoribosylaminoimidazole synthetase
CJJ81176_1675	gltA	-2.29802	-7.20565	-8.47831	-9.87629	citrate synthase
CJJ81176_pVir0034	-	-2.63824	-4.99068	-7.53565	-7.57457	hypothetical protein
C: List of genes whose insertion mutants show increased growth in DMEM supplemented with different amino acids.
Gene ID	Symbol		log2(fc)3			Annotation
		Rich medium	DMEM +Asn	DMEM +Gln	DMEM +Ser
CJJ81176_0098	fliM	-2.04222	4.08869	3.44832	3.28892	flagellar motor switch protein FliM
CJJ81176_0099	fliA	-1.86473	3.40975	3.00737	3.56417	flagellar biosynthesis sigma factor
CJJ81176_0100	flgV	-0.699077	3.70639	3.43614	3.73166	newly identified flagellar protein (Gao et al, 2014)
CJJ81176_0102	flhF	0.383854	4.30255	4.89904	4.77735	flagellar biosynthesis regulator FlhF
CJJ81176_0198	flgW	-1.15009	3.7625	4.29574	4.40423	newly identified flagellar protein (Gao et al, 2014)
CJJ81176_0199	flgX	-1.84834	2.87472	2.93589	2.62556	newly identified flagellar protein (Gao et al, 2014)
CJJ81176_0357	flhB	0.0489065	4.98603	5.50981	5.85248	flagellar biosynthesis protein FlhB
CJJ81176_0358	motB	-0.138988	3.77195	3.35856	3.60287	flagellar motor protein MotB
CJJ81176_0359	motA	-0.261471	3.61571	3.26213	3.44962	flagellar motor protein MotA
CJJ81176_0413	pflB	0.443063	3.98755	3.50402	3.6198	newly identified flagellar protein (Gao et al, 2014)
CJJ81176_0696	rpoN	-0.78797	4.54946	5.17245	5.15242	RNA polymerase factor sigma-54
CJJ81176_0814	flgR	-0.17268	4.99351	5.42674	5.78284	sensor histidine kinase
CJJ81176_0837	fliP	-0.428064	4.53452	5.21594	5.38016	flagellar biosynthesis protein FliP
CJJ81176_0890	flhA	-0.846158	4.49942	5.23498	5.68187	flagellar biosynthesis protein FlhA
CJJ81176_1043	flgS	0.0466534	5.54701	6.11745	6.45738	sigma-54 dependent DNA-binding response regulator
CJJ81176_1044	flgQ	-1.41289	3.06417	2.33168	2.56378	flagellar protein FlgQ
CJJ81176_1045	flgP	-0.6607	3.04457	2.32477	2.65176	flagellar protein FlgP
CJJ81176_1194	fliR	-0.297574	5.01778	5.75565	5.99865	flagellar biosynthesis protein FliR
CJJ81176_1459	flgK	-2.30212	4.39381	4.42378	2.0799	flagellar hook-associated protein FlgK
CJJ81176_1550	pflA	0.192979	3.72527	3.24826	3.43027	paralyzed flagella protein PflA
CJJ81176_1671	fliQ	-1.70023	4.0737	4.33026	5.21033	flagellar biosynthesis protein FliQ
CJJ81176_0996	-	-0.265696	4.50078	4.76291	4.99476	interact with FliF and FlgV (Gao et al, 2014)
CJJ81176_0103*	folK	-0.84238	2.44481	3.07788	2.90386	2-amino-4-hydroxy-6-hydroxymethyldihydropteridine pyrophosphokinase
CJJ81176_0891*	-	-0.235514	5.00193	5.87057	6.23583	RrF2 family protein, putative
CJJ81176_1195*	-	-4.09975	2.71738	3.36403	3.80621	ABC transporter, ATP-binding protein
CJJ81176_0066	-	0.141428	2.42895	3.19153	3.72852	cytochrome c biogenesis protein
CJJ81176_0479	-	-1.12486	2.73747	2.73365	3.09562	hypothetical protein
CJJ81176_0480	-	0.292343	3.61256	3.75385	4.15811	hypothetical protein
CJJ81176_0481	-	-0.391393	2.65833	2.69098	2.98057	hypothetical protein
CJJ81176_0808	-	1.3743	5.78789	6.41322	7.19452	TPR domain contaning protein
CJJ81176_1072	mutS	0.781999	3.7133	3.30537	3.1988	recombination and DNA strand exchange inhibitor protein
CJJ81176_1453	-	-0.190508	3.71612	3.91669	4.19478	response regulator
CJJ81176_pTet0022	-	0.476725	2.83791	2.82914	2.41812	toxin-antitoxin system, toxin component, HicA family
CJJ81176_pTet0039	-	0.334805	2.51921	2.66976	2.08513	type IV secretion system protein VirB11
1. These genes show log2(fc) <-3 in all 4 in vitro growth conditions.
2. These genes show log2(fc) <-3 in all 3 DMEM medium supplemented with amino acids but not in rich medium.
3. These genes show log2(fc) > 2 in all 3 DMEM medium supplemented with amino acids.
