# Supplementary material for: Metabolic and fitness determinants for in vitro growth and intestinal colonization of the bacterial pathogen Campylobacter jejuni
Source: PLoS Biol. 2017 May 19;15(5):e2001390. doi: 10.1371/journal.pbio.2001390 (PMC5438104; doi:10.1371/journal.pbio.2001390)
Supplement: S9 Table — (XLSX) [file pbio.2001390.s026.xlsx]

## Sheet: Sheet1
Table S9: Strains and plasmids used in this study
C. jejuni strain	Genotype (ORF) or description	Reference and/or source
81-176	Wild type	gift of Patricia Guerry
CB103	CJJ81176_1615 (sdaA)::aphA3	Hofreuter et al., 2012
CB176	CJJ81176_0479::aphA3	this study
CB177	CJJ81176_0480::aphA3	this study
CB178	CJJ81176_0481::aphA3	this study
CB182	CJJ81176_1300 (ktrA)::aphA3	this study
CB183	CJJ81176_1301 (ktrB)::cat	this study
CB185	CJJ81176_0699 (kdpA)::aphA3	this study
CB187	complemented ktrA mutant; ktrA::aphA3 (CJJ81176_1539::cat ktrA)	this study
CH84	CJJ81176_0169 (thrB)::aphA3	this study
CH85	CJJ81176_0039 (ilvD)::aphA3	this study
CH151	CJJ81176_0900 (serA)::aphA3	this study
CH152	CJJ81176_0336 (lysA)::aphA3	this study
CH153	CJJ81176_1056 (pycA)::cat	this study
CH154	CJJ81176_0900 (serA)::aphA, cjj81176_1615 (sdaA)::erm	this study
CH158	CJJ81176_0692 (argG)::aphA3	this study
7.1.1.17	CJJ81176_0712 (ackA)::aphA3, created by Tn552 tranposon mutagenesis	Novik et al., 2010
Plasmids
pBluescript II SK	Suicide vector in C. jejuni	Stratagene
pHV26	CJJ81176_0169 (thrB)::aphA3 in pBluescript II SK	this study
pHV28	CJJ81176_0039 (ilvD)::aphA3 in pBluescript II SK	this study
pHV44	CJJ81176_0900 (serA)::aphA3 in pBluescript II SK	this study
pHV46	CJJ81176_0336 (lysA)::aphA3 in pBluescript II SK	this study
pHV48	CJJ81176_1056 (pycA)::cat in pBluescript II SK	this study
pHV51	CJJ81176_1615 (sdaA)::erm in pBluescript II SK	this study
pHV56	CJJ81176_0692 (argG)::aphA3 in pBluescript II SK	this study
pILL600	Source of the aminoglycoside 3'-phosphotransferase gene (Km cassette)	Labigne-Roussel et al., 1988
pRY109	Source of the chloramphenicol acetyltransferase gene (cat cassette)	Yao et al., 1993
pSB3021	Complementation vector for constitutive expression of genes by chromosomal integration.	Watson et al., 2007
pSB3622	CJJ81176_1615 (sdaA)::aphA3 in pBluescript II SK	Hofreuter et al., 2012
pSB5363	CJJ81176_0479::aphA3 in pBluescript II SK	this study
pSB5364	CJJ81176_0480::aphA3 in pBluescript II SK	this study
pSB5365	CJJ81176_0481::aphA3 in pBluescript II SK	this study
pSB5366	CJJ81176_1300 (ktrB)::aphA3 in pBluescript II SK	this study
pSB5367	CJJ81176_1301 (ktrA)::cat in pBluescript II SK	this study
pSB5369	CJJ81176_0699 (kdpA)::aphA3 in pBluescript II SK	this study
References:
Hofreuter D, Mohr J, Wensel O, Rademacher S, Schreiber K, Schomburg D, Gao B, Galán JE (2012) Contribution of amino acid catabolism to the tissue specific persistence of Campylobacter jejuni in a murine colonization model. PLoS One 7(11): e50699
Novik V, Hofreuter D, Galán JE(2010) Identification of Campylobacter jejuni genes involved in its interaction with epithelial cells.Infect Immun.78(8):3540-53.
Labigne-Roussel A, Courcoux P, Tompkins L (1988) Gene disruption and replacement as a feasible approach for mutagenesis of Campylobacter jejuni. Journal of bacteriology 170: 1704-1708
Watson RO, Novik V, Hofreuter D, Lara-Tejero M, Galan JE (2007) A MyD88-deficient mouse model reveals a role for Nramp1 in Campylobacter jejuni infection. Infection and immunity 75: 1994-2003
Yao R, Alm RA, Trust TJ, Guerry P (1993) Construction of new Campylobacter cloning vectors and a new mutational cat cassette. Gene 130: 127-130
